# Supplementary material for: Pterostilbene Changes Epigenetic Marks at Enhancer Regions of Oncogenes in Breast Cancer Cells
Source: MDPI journal article supplement (doi:10.3390/antiox10081232), 2021-07-30
Supplement: s1 [file s1]

**Supplementary Table S1:** Pyrosequencing and QPCR primer sequences for *PITPNC1* and *LINC00910*.

| Gene                  | Primer sequences                                                                                                           | Annealing temperature [°C] | Amplicon length [bp] |
|-----------------------|----------------------------------------------------------------------------------------------------------------------------|----------------------------|----------------------|
| <b>Pyrosequencing</b> |                                                                                                                            |                            |                      |
| PITPNC1 (CpG #1-5)    | FW 5'- AGGAATAGTTTGAATTTGGGAGG -3'<br>RVBio 5'- AACCTCTACAACCTACTTATTAACCTACAT-3'<br>Seq 5'- AGGAGAAGGTTGTAGTGA -3'        | 58.5                       | 181                  |
| LINC00910 (CpG #1-8)  | FW 5'- TTGAGGGTTGGGATTTTTATTAGTAT -3'<br>RVBio 5'- ACCTCCTAACTACCTCCTCTCTAATTAC -3'<br>Seq 5'- AGTGTTTGGTAAGTTGA -3'       | 58.5                       | 165                  |
| LINC00910 (CpG #9-15) | FW 5'- TTAGAGAGGAAGTAGTTAGGAGGTTATTGG -3'<br>RVBio 5'- CTCAAAAAAAAAATTTATCCCAACCTTAC -3'<br>Seq 5'- GTTAGGAGGTTATTGGTT -3' | 55                         | 165                  |
| <b>QPCR</b>           |                                                                                                                            |                            |                      |
| PITPNC1               | FW 5'- GGACAACAAAGGAAGCAATGAC-3'<br>RV 5'- TTGTAGTAGCGCTCTGGAATTT-3'                                                       | 59                         | 111                  |
| LINC00910             | FW 5'- ACGTTCACAGGTACACAAAGG -3'<br>RV 5'- TCCCAGTATCCGACTAGCTTC -3'                                                       | 59                         | 92                   |
| GAPDH                 | FW 5'-TGCACCACCAACTGCTTA-3'<br>RV 5'-AGAGGCAGGGATGATGTTC-3'                                                                | 59                         | 177                  |
